# Supplementary material for: Proteome Profiling of the Dystrophic mdx Mice Diaphragm
Source: MDPI journal article supplement (doi:10.3390/biom13111648), 2023-11-13
Supplement: s1 [file s1]

**Table S1.** List of the enriched pathways in the *mdx* vs. WT analysis. Created based on the proteomics data (protein ID changed for gene ID for the purpose of analysis) using the Search Tool for the Retrieval of Interacting Genes/Proteins (STRING) database (and the incorporated Reactome and KEGG databases). FDR < 0.05

| #term ID                   | term description       | changed genes | all genes in the pathway | strengh | FDR      | Changed genes                                                                                                                                                                                                                                                                                                                                                                                                                                                                                                                                                                                                                                                                                                                                                                                                                                                                                                                         |
|----------------------------|------------------------|---------------|--------------------------|---------|----------|---------------------------------------------------------------------------------------------------------------------------------------------------------------------------------------------------------------------------------------------------------------------------------------------------------------------------------------------------------------------------------------------------------------------------------------------------------------------------------------------------------------------------------------------------------------------------------------------------------------------------------------------------------------------------------------------------------------------------------------------------------------------------------------------------------------------------------------------------------------------------------------------------------------------------------------|
| M<br>MU<br>-<br>168<br>256 | Immune System          | 154           | 1621                     | 0.35    | 7.06e-18 | Itgb2,Tubb6,Col1a1,Tubb5,Plaur,Calr,Cstb,Cd44,Vav1,Ctsb,Arpc2,Srp14,Galns,Cybb,Ctss,Ncf1,Ctsz,Myh9,Serpnb6a,Vtn,Cyba,Timp2,Atp6v1e1,Psme3,Apaf1,Hsp90b1,Tbk1,Lgmn,Npc2,Ddx41,Lpcat1,Hexb,Plau,Ripk3,Atp6v1c1,Igf2r,Tapbp,Csflr,P4hb,Pa2g4,Gusb,Casp1,Casp8,Anapc2,Pdia3,Fabp5,Ptpn1,Ptx3,S100a11,Vcam1,Tlr2,Bcl10,Fgr,Anapc4,Slc15a4,Ctsc,Copb1,Pak1,Asah1,Man2b1,Cotl1,Ifi30,Csk,Ltf,Nckap11,Rap2b,C1qb,Eef1a1,Grn,Dok3,Vat1,C1qa,Cul7,Itrp2,Cnpy3,Ckap4,Epx,Hk3,Lamp2,Stbd1,Glb1,Pstpip1,Tubb2a,Plekho2,Iqgap2,Itgam,Itgb5,H2Eb1,Hp,Tubb2b,Prep,Glmm,Impdh1,Tax1bp1,Plcg2,Wasf2,Klc1,Arpc1b,Card11,Col3a1,Fyb,Dock2,Casp3,Cdc27,Sec31a,Ncf4,Cd74,Ceacam1,Hmha1,Mrc2,Sirpa,Arpc3,Nos1,Cd63,Stat2,Psap,Cap1,Camk2d,Clta,Trim25,Gmfg,Ap1s1,Camp,Mlec,Eif4e2,Pja1,Atp6v1a,Tmem173,S100a9,Pld3,Syk,Lgals3,Arpc4,Dsp,Myo5a,Fbxo30,Ppia,Abi1,Ctsd,Cdc23,Stxbp2,Panx1,Iqgap1,Ptpn6,Myo9b,Ripk1,C5ar1,Keap1,Psmb9,Pja2,Actr3,Ptprc,Bin2,Ncf2 |
| M<br>MU<br>-<br>392<br>499 | Metabolism of proteins | 147           | 1609                     | 0.33    | 1.33e-15 | Galnt1,Rpl13,Tubb6,Pabpc1,Plaur,Rps11,Calr,Rpl8,Dnmt1,Ctr9,Rcn1,Rps9,Rplp1,Rps18,Srp14,Ctsz,Tnip1,Cog1,Psme3,Hdac2,Rab32,Hsp90b1,Gfpt2,Matn3,Lman2,Arf4,Rpl24,P4hb,Rps26,Bet11,Hgs,Pdia3,Pcna,Chgb,Bcl10,Alpl,Rpl6,Rpl28,Ctsc,Copb1,Rnf40,Nucb1,Rps4x,Ces1d,Arcn1,Rpl4,Copb2,Sec23ip,Npl,Spon1,Rpl21,Rab8b,Eef1a1,Spon2,Rpl2211,Rps271,Rpl37,Us28,Cul7,Ckap4,Pdia6,Rps23,Fn1,Tmed2,Glb1,Tmed3,Rpl37a,Tubb2a,Rab33b,Arfgap3,Rab13,Rpl7,Comm7,Hist1h2af,Rpl26,Rps12,Rps7,Npm1,Tubb2b,Rfwd2,Rpl17,Rpl15,Rps25,Rpl36,Rpl35,Rpl29,Rpl3,Rpl32,Rpl5,Rplp2,Man2a1,Rpl34,Lgals1,Cd109,Sec31a,Ccdc8,Golm1,Rpl23a,Rpl11,Hdac1,Rps8,Stam2,Rps6,Rpl7a,Stam,Igf2,Tnc,Dpm3,Rps16,Rps19,Top1,Vcan,Trp53bp1,Hnrnpc,Spp1,Obsl1,Copg1,Gfpt1,Rpl9,Rps28,Fstl1,Rpl35a,Prkcs,Renbp,Rpl13a,Eef1b2,Fbxo30,Rps15a,Rps20,Dda1,Ctsd,Mcf2,Rpl27a,Galnt4,Rps24,Mdga1,Ripk1,Dag1,Keap1,Nup50,Rpl14,Wac,Apoe,Psmb9,Specs3,Rpl31,Nop58                                |

|                                             |                                                                     |     |      |                        |                                                                                                                                                                                                                                                                                                                                                                                                                                                                                                                                                                                                                                                                                                                                                                                                 |
|---------------------------------------------|---------------------------------------------------------------------|-----|------|------------------------|-------------------------------------------------------------------------------------------------------------------------------------------------------------------------------------------------------------------------------------------------------------------------------------------------------------------------------------------------------------------------------------------------------------------------------------------------------------------------------------------------------------------------------------------------------------------------------------------------------------------------------------------------------------------------------------------------------------------------------------------------------------------------------------------------|
| <b>M<br/>MU<br/>-<br/>895<br/>385<br/>4</b> | Metabolism of RNA                                                   | 121 | 556  | 0.<br>7<br>4<br>1<br>1 | Rpl13,Pabpc1,Sf3a1,Rps11,Rpl8,Rps9,Wtap,Khsrp,Rplp1,Prpf31,Rps18,Prpf3,Rrp7a,Pelp1,P<br>sme3,Ddx39,Snrpf,Ftsj3,Mnat1,Smn1,Ppwd1,Pabpn1,Phf5a,Rpl24,Rbm22,Rps26,Wdr75,Ncl,<br>Cstf3,Ctnnbl1,Exosc9,Ncbp1,Ebna1bp2,Sf3a3,Srsf9,Rpl6,Ddx47,Rpl28,Mphosph10,Cstf2,Rp<br>s4x,Mphosph6,Rpl4,Tsr1,Cnot3,Wdr18,Rpl21,Ddx21,Rpl221,Thoc2,Rps271,Rpl37,Cpsf2,Ut<br>p15,Wdr43,Rpp38,Rps23,Rpl37a,Uspp39,Utp18,Rpl7,Pdcd11,Rpl26,Rps12,Rps7,Prpf38a,Rpl<br>17,Rpl15,Rps25,Rpl36,Rpl35,Rpl29,Rpl3,Rpl32,Rpl5,Rplp2,Gtf2f2,Rpl34,Isy1,Utp3,Nhp211,<br>Puf60,Rpl23a,Rpl11,Rps8,Rps6,Set,Rpl7a,Sf3b5,Cnot2,Fus,Rngtt,Rps16,Rps19,Cnot8,Polr2c<br>,Papola,Pes1,Srsf5,Hnrnp1,Rpl9,Rps28,Rpl35a,Pqbp1,Rpl13a,Snrpa1,Srsf6,Rps15a,Rps20,Sf<br>1,Rpl27a,Srrm1,Bud31,Rps24,Hnrnpf,Nup50,Rpl14,Tex10,Psmb9,Rpl31,Nop58 |
| <b>M<br/>MU<br/>-<br/>168<br/>249</b>       | Innate Immune System                                                | 114 | 949  | 0.<br>4<br>5<br>1<br>9 | Itgb2,Tubb5,Plaur,Cstb,Cd44,Vav1,Ctsb,Arpc2,Srp14,Galns,Cybb,Ctss,Ncf1,Ctsz,Myh9,Serp<br>inb6a,Vtn,Cyba,Timp2,Atp6v1c1,Psme3,Apaf1,Hsp90b1,Tbk1,Lgmn,Npc2,Ddx41,Lpcat1,He<br>xb,Plau,Ripk3,Atp6v1c1,Igf2r,Pa2g4,Gusb,Casp1,Casp8,Fabp5,Ptx3,S100a11,Tlr2,Bcl10,Fgr<br>,Slc15a4,Ctsc,Copb1,Pak1,Asah1,Man2b1,Cotl1,Ltf,Nckap11,Rap2b,C1qb,Eef1a1,Grn,Dok3,<br>Vat1,C1qa,Cnpy3,Ckap4,Epx,Hk3,Lamp2,Stbd1,Glb1,Pstpip1,Plekho2,Iqgap2,Itgam,Hp,Prpc<br>,Impdh1,Tax1bp1,Plcg2,Wasf2,Arpc1b,Card11,Dock2,Ncf4,Ceacam1,Hmha1,Sirpa,Arpc3,N<br>os1,Cd63,Psap,Cap1,Gmfg,Camp,Mlec,Atp6v1a,Tmem173,S100a9,Pld3,Syk,Lgals3,Arpc4,D<br>sp,Myo5a,Ppia,Abi1,Ctsd,Panx1,Iqgap1,Ptpn6,Myo9b,Ripk1,C5ar1,Psmb9,Actr3,Ptprc,Bin2,<br>Ncf2                                                                        |
| <b>M<br/>MU<br/>-<br/>597<br/>592</b>       | Post-translational protein<br>modification                          | 90  | 1254 | 0.<br>2<br>3<br>0<br>5 | Galnt1,Tubb6,Plaur,Calr,Dnmt1,Ctr9,Rcn1,Ctsz,Tnpi1,Cog1,Psme3,Hdac2,Rab32,Hsp90b1,<br>Gfpt2,Matn3,Lman2,Arf4,P4hb,Bet11,Hgs,Pdia3,Pcna,Chgb,Bcl10,Alpl,Ctsc,Copb1,Rnf40,N<br>ucb1,Arcn1,Copb2,Sec23ip,Npl,Spon1,Rab8b,Eef1a1,Spon2,Uspp28,Cul7,Ckap4,Pdia6,Fn1,T<br>med2,Glb1,Tmed3,Tubb2a,Rab33b,Arfgap3,Rab13,Commd7,Hist1h2af,Npm1,Tubb2b,Rfwd<br>2,Man2a1,Lgals1,Cd109,Sec31a,Ccdc8,Golm1,Hdac1,Stam2,Stam,Tnc,Dpm3,Top1,Vcan,Trp<br>53bp1,Hnrnp1,Spp1,Obsl1,Copg1,Gfpt1,Fstl1,Prkcs,Hnrnp1,Fbxo30,Dda1,Mcf2,Galnt4,Md<br>ga1,Ripk1,Dag1,Keap1,Nup50,Wac,Apoe,Psmb9,Nop58                                                                                                                                                                                                                   |
| <b>M<br/>MU<br/>-<br/>679<br/>122<br/>6</b> | Major pathway of rRNA<br>processing in the nucleolus and<br>cytosol | 73  | 171  | 1.<br>5<br>0<br>4<br>0 | Rpl13,Rps11,Rpl8,Rps9,Rplp1,Rps18,Rrp7a,Pelp1,Ftsj3,Rpl24,Rps26,Wdr75,Ncl,Exosc9,Eb<br>na1bp2,Rpl6,Ddx47,Rpl28,Mphosph10,Rps4x,Mphosph6,Rpl4,Tsr1,Wdr18,Rpl21,Ddx21,Rpl<br>2211,Rps271,Rpl37,Utp15,Wdr43,Rpp38,Rps23,Rpl37a,Utp18,Rpl7,Pdcd11,Rpl26,Rps12,Rps<br>7,Rpl17,Rpl15,Rps25,Rpl36,Rpl35,Rpl29,Rpl3,Rpl32,Rpl5,Rplp2,Rpl34,Utp3,Nhp211,Rpl23<br>a,Rpl11,Rps8,Rps6,Rpl7a,Rps16,Rps19,Pes1,Rpl9,Rps28,Rpl35a,Rpl13a,Rps15a,Rps20,Rpl2<br>7a,Rps24,Rpl14,Tex10,Rpl31,Nop58                                                                                                                                                                                                                                                                                                                 |
| <b>M<br/>MU<br/>-<br/>679</b>               | Neutrophil degranulation                                            | 73  | 519  | 0.<br>5<br>0<br>2      | Itgb2,Tubb5,Plaur,Cstb,Cd44,Ctsb,Srp14,Galns,Cybb,Ctss,Ctsz,Serp1b6a,Cyba,Timp2,Apaf<br>1,Npc2,Lpcat1,Hexb,Plau,Igf2r,Pa2g4,Gusb,Fabp5,Ptx3,S100a11,Tlr2,Fgr,Slc15a4,Ctsc,Copb<br>1,Asah1,Man2b1,Cotl1,Ltf,Nckap11,Rap2b,Eef1a1,Grn,Dok3,Vat1,Ckap4,Epx,Hk3,Lamp2,St<br>bd1,Glb1,Plekho2,Iqgap2,Itgam,Hp,Prpc,Impdh1,Dock2,Ceacam1,Hmha1,Sirpa,Cd63,Psap,C                                                                                                                                                                                                                                                                                                                                                                                                                                      |

|                                 |                                                                              |    |     |                              |                                                                                                                                                                                                                                                                                                                                                                                                 |
|---------------------------------|------------------------------------------------------------------------------|----|-----|------------------------------|-------------------------------------------------------------------------------------------------------------------------------------------------------------------------------------------------------------------------------------------------------------------------------------------------------------------------------------------------------------------------------------------------|
| 869<br>5                        |                                                                              |    |     | 1<br>5                       | ap1,Gmfg,Camp,Mlec,Tmem173,S100a9,Lgals3,Dsp,Ppia,Ctsd,Iqgap1,Ptpn6,C5ar1,Ptprc,Bin2                                                                                                                                                                                                                                                                                                            |
| M<br>MU<br>-<br>109<br>582      | Hemostasis                                                                   | 59 | 524 | 0.<br>4<br>3                 | 7.<br>9<br>5<br>e-<br>0<br>9<br>Itgb2,Tubb6,Coll1a1,Plaur,Cd44,Vav1,Itih3,Apbb1ip,Serpinb6a,Sparc,Hdac2,Habp4,Plau,Itga5,Pcyox11,Dock8,Grb14,Ptpn1,Pdpn,Fgr,P2rx4,Csk,Atp1b3,Islr,Itpr2,Lamp2,Fn1,Tubb2a,Lhfp12,Itgam,Pla2g4a,Tubb2b,Prp,Dock10,Plcg2,Klc1,Dock2,Cd109,Cd74,Ceacam1,Sirpa,Nos1,Hdac1,Akap10,Plek,Cd63,Psap,Igf2,Tagln2,Kdm1a,Cbx5,Syk,Ppia,Cd84,Stxbp2,Ptpn6,Slc3a2,Glg1,Jmjd1c |
| M<br>MU<br>-<br>727<br>66       | Translation                                                                  | 54 | 223 | 0.<br>7<br>6<br>e-<br>2<br>0 | 4.<br>4<br>6<br>Rpl13,Pabpc1,Rps11,Rpl8,Rps9,Rplp1,Rps18,Srp14,Rpl24,Rps26,Rpl6,Rpl28,Rps4x,Rpl4,Rpl21,Eef1a1,Rpl2211,Rps271,Rpl37,Rps23,Rpl37a,Rpl7,Rpl26,Rps12,Rps7,Rpl17,Rpl15,Rps25,Rpl36,Rpl35,Rpl29,Rpl3,Rpl32,Rpl5,Rplp2,Rpl34,Rpl23a,Rpl11,Rps8,Rps6,Rpl7a,Rps16,Rps19,Rpl9,Rps28,Rpl35a,Rpl13a,Eef1b2,Rps15a,Rps20,Rpl27a,Rps24,Rpl14,Rpl31                                            |
| M<br>MU<br>-<br>565<br>365<br>6 | Vesicle-mediated transport                                                   | 54 | 594 | 0.<br>3<br>3<br>e-<br>0<br>5 | 2.<br>4<br>4<br>Galnt1,Tubb6,Sh3gl1,Calr,Pafah1b3,Arpc2,Ctsz,Sparc,Cog1,Rab32,Hsp90b1,Lman2,Arf4,Igf2r,Ap3s1,Msr1,Bet11,Hgs,Acdb3,Ctsc,Copb1,Arcn1,Copb2,Sec23ip,Rab8b,Stab1,Tmed2,Tmed3,Tubb2a,Rab33b,Arfgap3,Rab3gap2,Rab13,Pla2g4a,Hp,Tubb2b,Klc1,Gcc1,Tpd52,Sec31a,Ctnn,Arpc3,Sort1,Stam2,Stam,Cyth2,CltA,Ap1s1,Fnbp1,Copg1,Arpc4,Mcfd2,Apoe,Actr3                                          |
| M<br>MU<br>-<br>975<br>956      | Nonsense Mediated Decay (NMD) independent of the Exon Junction Complex (EJC) | 52 | 90  | 1.<br>1<br>4<br>e-<br>3<br>3 | 2.<br>3<br>7<br>Rpl13,Pabpc1,Rps11,Rpl8,Rps9,Rplp1,Rps18,Rpl24,Rps26,Ncbp1,Rpl6,Rpl28,Rps4x,Rpl4,Rpl21,Rpl2211,Rps271,Rpl37,Rps23,Rpl37a,Rpl7,Rpl26,Rps12,Rps7,Rpl17,Rpl15,Rps25,Rpl36,Rpl35,Rpl29,Rpl3,Rpl32,Rpl5,Rplp2,Rpl34,Rpl23a,Rpl11,Rps8,Rps6,Rpl7a,Rps16,Rps19,Rpl9,Rps28,Rpl35a,Rpl13a,Rps15a,Rps20,Rpl27a,Rps24,Rpl14,Rpl31                                                          |
| M<br>MU<br>-<br>975<br>957      | Nonsense Mediated Decay (NMD) enhanced by the Exon Junction Complex (EJC)    | 52 | 110 | 1.<br>0<br>5<br>e-<br>3<br>0 | 2.<br>9<br>3<br>Rpl13,Pabpc1,Rps11,Rpl8,Rps9,Rplp1,Rps18,Rpl24,Rps26,Ncbp1,Rpl6,Rpl28,Rps4x,Rpl4,Rpl21,Rpl2211,Rps271,Rpl37,Rps23,Rpl37a,Rpl7,Rpl26,Rps12,Rps7,Rpl17,Rpl15,Rps25,Rpl36,Rpl35,Rpl29,Rpl3,Rpl32,Rpl5,Rplp2,Rpl34,Rpl23a,Rpl11,Rps8,Rps6,Rpl7a,Rps16,Rps19,Rpl9,Rps28,Rpl35a,Rpl13a,Rps15a,Rps20,Rpl27a,Rps24,Rpl14,Rpl31                                                          |

|                                             |                                                                   |    |     |                              |                                                                                                                                                                                                                                                                                                                                                  |
|---------------------------------------------|-------------------------------------------------------------------|----|-----|------------------------------|--------------------------------------------------------------------------------------------------------------------------------------------------------------------------------------------------------------------------------------------------------------------------------------------------------------------------------------------------|
| <b>M<br/>MU<br/>-<br/>128<br/>021<br/>8</b> | Adaptive Immune System                                            | 52 | 701 | 0.<br>0.<br>2<br>4<br>4<br>0 | 0.<br>0.<br>2<br>0<br>4<br>0<br>Itgb2,Tubb6,Col1a1,Calr,Vav1,Ctsb,Cybb,Ctss,Ncf1,Cyba,Psme3,Lgmn,Tapbp,Anapc2,Pdia3,Vcam1,Bcl10,Anapc4,Ctsc,Pak1,Ifi30,Csk,Cul7,Itpr2,Tubb2a,Itgb5,H2-Eb1,Tubb2b,Glmm,Plcg2,Klcl,Card11,Col3a1,Fyb,Cdc27,Sec31a,Ncf4,Cd74,Mrc2,CltA,Ap1s1,Pja1,Syk,Fbxo30,Ctsd,Cdc23,Ptpn6,Keap1,Psmb9,Pja2,Ptpcr,Ncf2           |
| <b>M<br/>MU<br/>-<br/>179<br/>933<br/>9</b> | SRP-dependent cotranslational protein targeting to membrane       | 51 | 88  | 1.<br>1<br>4<br>3<br>3       | 8.<br>2<br>4<br>e-<br>3<br>3<br>Rpl13,Rps11,Rpl8,Rps9,Rplp1,Rps18,Srp14,Rpl24,Rps26,Rpl6,Rpl28,Rps4x,Rpl4,Rpl21,Rpl2211,Rps271,Rpl37,Rps23,Rpl37a,Rpl7,Rpl26,Rps12,Rps7,Rpl17,Rpl15,Rps25,Rpl36,Rpl35,Rpl29,Rpl3,Rpl32,Rpl5,Rplp2,Rpl34,Rpl23a,Rpl11,Rps8,Rps6,Rpl7a,Rps16,Rps19,Rpl9,Rps28,Rpl35a,Rpl13a,Rps15a,Rps20,Rpl27a,Rps24,Rpl14,Rpl31  |
| <b>M<br/>MU<br/>-<br/>156<br/>827</b>       | L13a-mediated translational silencing of Ceruloplasmin expression | 51 | 107 | 1.<br>0<br>5<br>3<br>0       | 6.<br>9<br>3<br>e-<br>3<br>0<br>Rpl13,Pabpc1,Rps11,Rpl8,Rps9,Rplp1,Rps18,Rpl24,Rps26,Rpl6,Rpl28,Rps4x,Rpl4,Rpl21,Rpl2211,Rps271,Rpl37,Rps23,Rpl37a,Rpl7,Rpl26,Rps12,Rps7,Rpl17,Rpl15,Rps25,Rpl36,Rpl35,Rpl29,Rpl3,Rpl32,Rpl5,Rplp2,Rpl34,Rpl23a,Rpl11,Rps8,Rps6,Rpl7a,Rps16,Rps19,Rpl9,Rps28,Rpl35a,Rpl13a,Rps15a,Rps20,Rpl27a,Rps24,Rpl14,Rpl31 |
| <b>M<br/>MU<br/>-<br/>727<br/>37</b>        | Cap-dependent Translation Initiation                              | 51 | 115 | 1.<br>0<br>2<br>e-<br>2<br>9 | 8.<br>6<br>4<br>e-<br>2<br>9<br>Rpl13,Pabpc1,Rps11,Rpl8,Rps9,Rplp1,Rps18,Rpl24,Rps26,Rpl6,Rpl28,Rps4x,Rpl4,Rpl21,Rpl2211,Rps271,Rpl37,Rps23,Rpl37a,Rpl7,Rpl26,Rps12,Rps7,Rpl17,Rpl15,Rps25,Rpl36,Rpl35,Rpl29,Rpl3,Rpl32,Rpl5,Rplp2,Rpl34,Rpl23a,Rpl11,Rps8,Rps6,Rpl7a,Rps16,Rps19,Rpl9,Rps28,Rpl35a,Rpl13a,Rps15a,Rps20,Rpl27a,Rps24,Rpl14,Rpl31 |
| <b>M<br/>MU<br/>-<br/>726<br/>89</b>        | Formation of a pool of free 40S subunits                          | 50 | 97  | 1.<br>0<br>9<br>3<br>0       | 2.<br>2<br>9<br>e-<br>3<br>0<br>Rpl13,Rps11,Rpl8,Rps9,Rplp1,Rps18,Rpl24,Rps26,Rpl6,Rpl28,Rps4x,Rpl4,Rpl21,Rpl2211,Rps271,Rpl37,Rps23,Rpl37a,Rpl7,Rpl26,Rps12,Rps7,Rpl17,Rpl15,Rps25,Rpl36,Rpl35,Rpl29,Rpl3,Rpl32,Rpl5,Rplp2,Rpl34,Rpl23a,Rpl11,Rps8,Rps6,Rpl7a,Rps16,Rps19,Rpl9,Rps28,Rpl35a,Rpl13a,Rps15a,Rps20,Rpl27a,Rps24,Rpl14,Rpl31        |
| <b>M<br/>MU<br/>-<br/>727<br/>06</b>        | GTP hydrolysis and joining of the 60S ribosomal subunit           | 50 | 108 | 1.<br>0<br>2<br>4<br>e-      | 7.<br>4<br>2<br>e-<br>4<br>Rpl13,Rps11,Rpl8,Rps9,Rplp1,Rps18,Rpl24,Rps26,Rpl6,Rpl28,Rps4x,Rpl4,Rpl21,Rpl2211,Rps271,Rpl37,Rps23,Rpl37a,Rpl7,Rpl26,Rps12,Rps7,Rpl17,Rpl15,Rps25,Rpl36,Rpl35,Rpl29,Rpl3,Rpl32,Rpl5,Rplp2,Rpl34,Rpl23a,Rpl11,Rps8,Rps6,Rpl7a,Rps16,Rps19,Rpl9,Rps28,Rpl35a,Rpl13a,Rps15a,Rps20,Rpl27a,Rps24,Rpl14,Rpl31             |

|                                             |                                                 |    |     |                              |                                                                                                                                                                                                                                                                                                   |
|---------------------------------------------|-------------------------------------------------|----|-----|------------------------------|---------------------------------------------------------------------------------------------------------------------------------------------------------------------------------------------------------------------------------------------------------------------------------------------------|
|                                             |                                                 |    |     | 2<br>9                       |                                                                                                                                                                                                                                                                                                   |
| <b>M<br/>MU<br/>-<br/>199<br/>991</b>       | Membrane Trafficking                            | 47 | 560 | 0.<br>0.<br>3<br>7<br>1      | Galnt1,Tubb6,Sh3gl1,Pafah1b3,Arpc2,Ctsz,Cog1,Rab32,Lman2,Arf4,Igf2r,Ap3s1,Bet11,Hgs,Acbd3,Ctsc,Copb1,Arcn1,Copb2,Sec23ip,Rab8b,Tmed2,Tmed3,Tubb2a,Rab33b,Arfgap3,Rab3gap2,Rab13,Pla2g4a,Tubb2b,Klc1,Gcc1,Tpd52,Sec31a,Ctnn,Arpc3,Sort1,Stam2,Stam,Cyth2,Clta,Ap1s1,Fnbp1,Copg1,Arpc4,Mcf2,Actr3   |
| <b>M<br/>MU<br/>-<br/>147<br/>424<br/>4</b> | Extracellular matrix organization               | 45 | 295 | 0.<br>5<br>6<br>e-<br>1<br>0 | 2.<br>5<br>3<br>Itgb2,Col1a1,Cd44,Ctsb,Htra1,P4ha1,Ctss,Vtn,Timp2,Sparc,P4ha2,Plod1,Matn3,Itga5,Leprel2,P4hb,Col5a1,Vcam1,Emilin1,Pcolce,Acan,Mmp2,Ppib,Colgalt1,Fbln2,Fn1,Itgam,Itgb5,Sh3pxd2a,Crtap,Col5a2,Capn6,Col3a1,Ceacam1,Matn1,Lepre1,Tnc,Vcan,Col14a1,Spp1,Ctsd,Plod2,Serpinh1,Lox,Dag1 |
| <b>M<br/>MU<br/>-<br/>194<br/>315</b>       | Signaling by Rho GTPases                        | 43 | 381 | 0.<br>5<br>4<br>e-<br>0<br>6 | 2.<br>0<br>5<br>Tubb6,Rhoc,Vav1,Arpc2,Cybb,Ncf1,Myh9,Cyba,Ywhah,Evl,Hgs,Arhgef2,Arhgdib,Pak1,Nckap11,Gmip,Fmn11,Arhgap15,Rhoj,Tubb2a,Iqgap2,Rcc2,Tubb2b,Wasf2,Klc1,Arpc1b,Arhgap24,Ncf4,Hmha1,Mad211,Arpc3,Myh10,Gopc,Arap1,Fgd3,Arhgap25,S100a9,Arpc4,Abi1,Iqgap1,Myo9b,Actr3,Ncf2               |
| <b>M<br/>MU<br/>-<br/>900<br/>693<br/>4</b> | Signaling by Receptor Tyrosine Kinases          | 39 | 418 | 0.<br>0.<br>3<br>0<br>4<br>5 | 0.<br>0<br>Col1a1,Sh3gl1,Vav1,Cybb,Ncf1,Cyba,Atp6v1e1,Thbs4,Atp6v1c1,Hgs,Col5a1,Ptpn1,Ncbp1,Ptpn12,Pak1,Csk,Nckap11,Cilp,Fn1,Chd4,Wasf2,Col5a2,Col3a1,Gtf2f2,Tia1,Ncf4,Stam2,Stam,Igf2,Clta,Polr2c,Spp1,Nrp2,Atp6v1a,Abi1,Ptpn6,Hnrnpf,Ncf2,Erb2ip                                                |
| <b>M<br/>MU<br/>-<br/>722<br/>03</b>        | Processing of Capped Intron-Containing Pre-mRNA | 38 | 234 | 0.<br>5<br>8<br>e-<br>0<br>9 | 2.<br>1<br>5<br>Sf3a1,Wtap,Prpf31,Prpf3,Ddx39,Snrpf,Ppwd1,Pabpn1,Phf5a,Rbm22,Cstf3,Ctnnbl1,Ncbp1,Sf3a3,Srsf9,Cstf2,Thoc2,Cpsf2,Usp39,Prpf38a,Gtf2f2,Isy1,Nhp211,Puf60,Sf3b5,Fus,Polr2c,Papola,Srsf5,Hnrnpc,Pqbp1,Snrpa1,Srsf6,Sfl,Srrm1,Bud31,Hnrnpf,Nup50                                        |
| <b>M<br/>MU<br/>-</b>                       | Cellular responses to external stimuli          | 35 | 397 | 0.<br>3<br>2                 | 0.<br>0<br>Tubb6,Ehmt2,Cybb,Ncf1,Cyba,Atp6v1e1,Psme3,Asf1a,Gpx8,Atp6v1c1,P4hb,Cdk2,Anapc2,Gpx7,Dnajc2,Anapc4,Mt2,Eef1a1,Ptges3,Tubb2a,Hist1h1a,Hist1h2af,Tubb2b,Hist1h1b,Cdc27,Ncf4,Rbbp4,Sirt1,Camk2d,Atp6v1a,Cdc23,Cdkn1c,Nup50,Psmb9,Ncf2                                                      |

|                                 |                                                   |    |     |                                              |                                                                                                                                                                                                                               |
|---------------------------------|---------------------------------------------------|----|-----|----------------------------------------------|-------------------------------------------------------------------------------------------------------------------------------------------------------------------------------------------------------------------------------|
| 895<br>389<br>7                 |                                                   |    |     | 2<br>6                                       |                                                                                                                                                                                                                               |
| M<br>MU<br>-<br>721<br>63       | mRNA Splicing - Major<br>Pathway                  | 34 | 178 | 0.<br>5<br>6<br>1<br>e-<br>1<br>0            | Sf3a1,Prpf31,Prpf3,Snrpf,Ppwd1,Pabpn1,Phf5a,Rbm22,Cstf3,Ctnnb11,Ncbp1,Sf3a3,Srsf9,Cstf2,Cpsf2,Usp39,Prpf38a,Gtf2f2,Isy1,Nhp211,Puf60,Sf3b5,Fus,Polr2c,Papola,Srsf5,Hnrnpc,Pqbp1,Snrpa1,Srsf6,Sf1,Srrm1,Bud31,Hnrnpf           |
| M<br>MU<br>-<br>226<br>275<br>2 | Cellular responses to stress                      | 34 | 395 | 0.<br>0<br>3<br>0<br>1<br>4<br>7             | Tubb6,Ehmt2,Cybb,Ncf1,Cyba,Atp6v1e1,Psme3,Asf1a,Gpx8,Atp6v1c1,P4hb,Cdk2,Anapc2,Gpx7,Dnajc2,Anapc4,Eef1a1,Ptges3,Tubb2a,Hist1h1a,Hist1h2af,Tubb2b,Hist1h1b,Cdc27,Ncf4,Rbbp4,Sirt1,Camk2d,Atp6v1a,Cdc23,Cdkn1c,Nup50,Psmb9,Ncf2 |
| M<br>MU<br>-<br>195<br>258      | RHO GTPase Effectors                              | 30 | 246 | 4.<br>7<br>0.<br>7<br>4<br>6<br>e-<br>0<br>5 | Tubb6,Rhoc,Arpc2,Cybb,Ncf1,Myh9,Cyba,Ywhah,Evl,Pak1,Nckap11,Fmn11,Tubb2a,Iqgap2,Rcc2,Tubb2b,Wasf2,Klc1,Arpc1b,Ncf4,Mad211,Arpc3,Myh10,Gopc,S100a9,Arpc4,Abi1,Iqgap1,Actr3,Ncf2                                                |
| M<br>MU<br>-<br>446<br>203      | Asparagine N-linked<br>glycosylation              | 28 | 263 | 0.<br>0<br>0<br>4<br>0<br>8<br>2             | Tubb6,Calr,Ctsz,Cog1,Gfpt2,Lman2,Arf4,Bet11,Pdia3,Ctsc,Copb1,Arcn1,Copb2,Sec23ip,Npl,Tmed2,Glb1,Tmed3,Tubb2a,Arfgap3,Tubb2b,Man2a1,Sec31a,Dpm3,Copg1,Gfpt1,Renbp,Mcf2                                                         |
| M<br>MU<br>-<br>760<br>02       | Platelet activation, signaling and<br>aggregation | 26 | 253 | 0.<br>0<br>3<br>0<br>9<br>2<br>3             | Col1a1,Vav1,Itih3,Apbb1ip,Sparc,Habp4,Pcyox11,Ptpn1,Pdpn,Csk,Islr,Itpr2,Lamp2,Fn1,Lhfp12,Pla2g4a,Plcg2,Cd109,Plek,Cd63,Psap,Igf2,Tagln2,Syk,Stxbp2,Ptpn6                                                                      |
| M<br>MU<br>-                    | Axon guidance                                     | 25 | 278 | 0.<br>3<br>0<br>3                            | Tubb6,Rhoc,Arpc2,Evl,Itga5,Dpysl3,Col5a1,Vasp,Pak1,Mmp2,Tubb2a,Tubb2b,Enah,Arpc1b,Col5a2,Col3a1,Arpc3,Cltla,Msn,Arpc4,Myo9b,Dag1,Ncam1,Actr3,Ptprc                                                                            |

|                                 |                                                       |    |     |                         |                                                                                                                                                                    |
|---------------------------------|-------------------------------------------------------|----|-----|-------------------------|--------------------------------------------------------------------------------------------------------------------------------------------------------------------|
| 422<br>475                      |                                                       |    |     | 5<br>2                  |                                                                                                                                                                    |
| M<br>MU<br>-<br>681<br>144<br>2 | Intra-Golgi and retrograde<br>Golgi-to-ER traffic     | 22 | 186 | 0.<br>4<br>5            | 0.<br>0<br>1<br>4<br>Galnt1,Tubb6,Pafah1b3,Cog1,Arf4,Igf2r,Bet11,Copb1,Arcn1,Copb2,Tmed2,Tmed3,Tubb2a,Rab33b,Arfgap3,Rab3gap2,Pla2g4a,Tubb2b,Klc1,Gcc1,Cyth2,Copg1 |
| M<br>MU<br>-<br>147<br>429<br>0 | Collagen formation                                    | 20 | 96  | 0.<br>6<br>9            | 2.<br>2<br>5<br>e-<br>0<br>6<br>Col1a1,Ctsb,P4ha1,Ctss,P4ha2,Plod1,Leprel2,P4hb,Col5a1,Pcolce,Ppib,Colgalt1,Crtap,Col5a2,Col3a1,Leprel1,Col14a1,Plod2,Serpinh1,Lox |
| M<br>MU<br>-<br>948<br>021      | Transport to the Golgi and<br>subsequent modification | 20 | 177 | 0.<br>4<br>3            | 0.<br>0<br>4<br>5<br>Tubb6,Ctsz,Cog1,Lman2,Arf4,Bet11,Ctsc,Copb1,Arcn1,Copb2,Sec23ip,Tmed2,Tmed3,Tubb2a,Arfgap3,Tubb2b,Man2a1,Sec31a,Copg1,Mcfd2                   |
| M<br>MU<br>-<br>726<br>49       | Translation initiation complex<br>formation           | 19 | 57  | 0.<br>9<br>e-<br>0<br>9 | 8.<br>6<br>4<br>e-<br>0<br>9<br>Pabpc1,Rps11,Rps9,Rps18,Rps26,Rps4x,Rps27l,Rps23,Rps12,Rps7,Rps25,Rps8,Rps6,Rps16,Rps19,Rps28,Rps15a,Rps20,Rps24                   |
| M<br>MU<br>-<br>199<br>977      | ER to Golgi Anterograde<br>Transport                  | 19 | 147 | 0.<br>4<br>9            | 0.<br>0<br>1<br>5<br>Tubb6,Ctsz,Cog1,Lman2,Arf4,Bet11,Ctsc,Copb1,Arcn1,Copb2,Sec23ip,Tmed2,Tmed3,Tubb2a,Arfgap3,Tubb2b,Sec31a,Copg1,Mcfd2                          |
| M<br>MU<br>-<br>692<br>42       | S Phase                                               | 19 | 147 | 0.<br>4<br>9            | 0.<br>0<br>1<br>5<br>Mcm7,Pola1,Psme3,Mnat1,Mcm4,Rfc4,Fen1,Cdk2,Mcm6,Anapc2,Pcna,Anapc4,Mcm3,Mcm2,Cdc27,Cdc23,Mcm5,Cdkn1c,Psmb9                                    |

|                                             |                                                                                                                             |    |     |              |                              |                                                                                                                      |
|---------------------------------------------|-----------------------------------------------------------------------------------------------------------------------------|----|-----|--------------|------------------------------|----------------------------------------------------------------------------------------------------------------------|
| <b>M<br/>MU<br/>-<br/>726<br/>95</b>        | Formation of the ternary complex, and subsequently, the 43S complex                                                         | 18 | 50  | 0.<br>9<br>3 | 9.<br>1<br>2<br>e-<br>0<br>9 | Rps11,Rps9,Rps18,Rps26,Rps4x,Rps27l,Rps23,Rps12,Rps7,Rps25,Rps8,Rps6,Rps16,Rps19,Rps28,Rps15a,Rps20,Rps24            |
| <b>M<br/>MU<br/>-<br/>727<br/>02</b>        | Ribosomal scanning and start codon recognition                                                                              | 18 | 57  | 0.<br>8<br>7 | 4.<br>8<br>5<br>e-<br>0<br>8 | Rps11,Rps9,Rps18,Rps26,Rps4x,Rps27l,Rps23,Rps12,Rps7,Rps25,Rps8,Rps6,Rps16,Rps19,Rps28,Rps15a,Rps20,Rps24            |
| <b>M<br/>MU<br/>-<br/>381<br/>426</b>       | Regulation of Insulin-like Growth Factor (IGF) transport and uptake by Insulin-like Growth Factor Binding Proteins (IGFBPs) | 18 | 122 | 0.<br>5<br>4 | 0.<br>0<br>0<br>5<br>8       | Rcn1,Hsp90b1,Matn3,P4hb,Chgb,Nucb1,Ckap4,Pdia6,Fn1,Lgals1,Golm1,Igf2,Tnc,Vcan,Spp1,Fstl1,Prkcsh,Apoe                 |
| <b>M<br/>MU<br/>-<br/>165<br/>081<br/>4</b> | Collagen biosynthesis and modifying enzymes                                                                                 | 17 | 63  | 0.<br>8<br>1 | 9.<br>9<br>6<br>e-<br>0<br>7 | Col1a1,P4ha1,P4ha2,Plod1,Leprel2,P4hb,Col5a1,Pcolce,Ppib,Colgalt1,Crtap,Col5a2,Col3a1,Leprel1,Col14a1,Plod2,Serpinh1 |
| <b>M<br/>MU<br/>-<br/>202<br/>948<br/>0</b> | Fcgamma receptor (FCGR) dependent phagocytosis                                                                              | 17 | 82  | 0.<br>6<br>9 | 2.<br>3<br>0<br>e-<br>0<br>5 | Vav1,Arpc2,Myh9,Fgr,Pak1,Nckap1l,Plcg2,Wasf2,Arpc1b,Arpc3,Pld3,Syk,Arpc4,Myo5a,Abi1,Myo9b,Actr3                      |
| <b>M<br/>MU<br/>-<br/>397<br/>014</b>       | Muscle contraction                                                                                                          | 17 | 171 | 0.<br>3<br>7 | 0.<br>0<br>3<br>5<br>7       | Tpm4,Actn3,Myl4,Myh8,Myl6b,Vim,Pak1,Atp1b3,Itpr2,Itgb5,Myh6,Nos1,Camk2d,Myh3,Tnnt2,Dmd,Mybpc2                        |



|                                             |                                                |    |     |              |                             |                                                                                                            |
|---------------------------------------------|------------------------------------------------|----|-----|--------------|-----------------------------|------------------------------------------------------------------------------------------------------------|
| <b>M<br/>MU<br/>-<br/>895<br/>727<br/>5</b> | Post-translational protein phosphorylation     | 17 | 116 | 0.<br>5<br>4 | 0.<br>0<br>0<br>0<br>9<br>8 | Rcn1,Hsp90b1,Matn3,P4hb,Chgb,Nucb1,Ckap4,Pdia6,Fn1,Lgals1,Golm1,Tnc,Vcan,Sppl,Fstl1,Prkcs,Apoe             |
| <b>M<br/>MU<br/>-<br/>692<br/>39</b>        | Synthesis of DNA                               | 17 | 118 | 0.<br>5<br>3 | 0.<br>0<br>0<br>1<br>2      | Mcm7,Pola1,Psme3,Mcm4,Rfc4,Fen1,Cdk2,Mcm6,Anapc2,Pcna,Anapc4,Mcm3,Mcm2,Cdc27,Cdc23,Mcm5,Psmb9              |
| <b>M<br/>MU<br/>-<br/>202<br/>733</b>       | Cell surface interactions at the vascular wall | 16 | 114 | 0.<br>5<br>2 | 0.<br>0<br>0<br>2<br>3      | Itgb2,Col1a1,Cd44,Itga5,Grb14,Atp1b3,Fn1,Itgam,Cd74,Ceacam1,Sirpa,Ppia,Cd84,Ptpn6,Slc3a2,Glg1              |
| <b>M<br/>MU<br/>-<br/>885<br/>668<br/>8</b> | Golgi-to-ER retrograde transport               | 16 | 128 | 0.<br>4<br>7 | 0.<br>0<br>0<br>6<br>6      | Galnt1,Tubb6,Pafah1b3,Arf4,Copb1,Arcn1,Copb2,Tmed2,Tmed3,Tubb2a,Arfgap3,Rab3gap2,Pla2g4a,Tubb2b,Klcl,Copg1 |
| <b>M<br/>MU<br/>-<br/>114<br/>608</b>       | Platelet degranulation                         | 15 | 122 | 0.<br>4<br>6 | 0.<br>0<br>1<br>0<br>9      | Itih3,Sparc,Habp4,Pcyox11,Islr,Lamp2,Fn1,Lhfp12,Cd109,Plek,Cd63,Psap,Igf2,Tagln2,Stxbp2                    |
| <b>M<br/>MU<br/>-<br/>213<br/>229<br/>5</b> | MHC class II antigen presentation              | 15 | 138 | 0.<br>4<br>1 | 0.<br>0<br>2<br>9<br>4      | Tubb6,Ctsb,Ctss,Lgmn,Ctsc,Ifi30,Tubb2a,H2-Eb1,Tubb2b,Klcl,Sec31a,Cd74,Clt,Ap1s1,Ctsd                       |

|                                             |                                                           |    |     |                   |                              |                                                                                      |
|---------------------------------------------|-----------------------------------------------------------|----|-----|-------------------|------------------------------|--------------------------------------------------------------------------------------|
| <b>M<br/>MU<br/>-<br/>147<br/>422<br/>8</b> | Degradation of the extracellular matrix                   | 15 | 144 | 0.<br>3<br>9      | 0.<br>0<br>4<br>0<br>5       | Col1a1,Cd44,Ctsb,Htra1,Ctss,Timp2,Col5a1,Acan,Mmp2,Fn1,Col5a2,Capn6,Col3a1,Spp1,Ctsd |
| <b>M<br/>MU<br/>-<br/>300<br/>017<br/>8</b> | ECM proteoglycans                                         | 14 | 50  | 0.<br>8<br>2      | 1.<br>1<br>2<br>e-<br>0<br>5 | Col1a1,Vtn,Sparc,Matn3,Col5a1,Acan,Fn1,Itgb5,Col5a2,Col3a1,Matn1,Tnc,Vcan,Dag1       |
| <b>M<br/>MU<br/>-<br/>202<br/>948<br/>2</b> | Regulation of actin dynamics for phagocytic cup formation | 14 | 61  | 0.<br>7<br>3      | 7.<br>6<br>5<br>e-<br>0<br>5 | Vav1,Arpc2,Myh9,Pak1,Nckap1l,Wasf2,Arpc1b,Arpc3,Syk,Arpc4,Myo5a,Abi1,Myo9b,Actr3     |
| <b>M<br/>MU<br/>-<br/>216<br/>083</b>       | Integrin cell surface interactions                        | 14 | 79  | 0.<br>6<br>2      | 0.<br>0<br>0<br>0<br>8<br>2  | Itgb2,Col1a1,Cd44,Vtn,Itga5,Col5a1,Vcam1,Fn1,Itgam,Itgb5,Col5a2,Col3a1,Tnc,Spp1      |
| <b>M<br/>MU<br/>-<br/>453<br/>279</b>       | Mitotic G1 phase and G1/S transition                      | 14 | 131 | 0.<br>4<br>4<br>3 | 0.<br>0<br>4<br>4<br>3       | Mcm7,Pola1,Psme3,Mnat1,Mcm4,Cdk2,Mcm6,Mcm3,Mcm2,Hdac1,Rbbp4,Mcm5,Cdkn1c,Psmb9        |
| <b>M<br/>MU<br/>-<br/>738<br/>56</b>        | RNA Polymerase II Transcription Termination               | 13 | 63  | 0.<br>6<br>9      | 0.<br>0<br>0<br>4<br>4       | Ddx39,Snrpf,Pabpn1,Cstf3,Ncbp1,Srsf9,Cstf2,Thoc2,Cpsf2,Papola,Srsf5,Srsf6,Srrm1      |

|                                             |                                                                       |    |     |              |                        |                                                                                  |
|---------------------------------------------|-----------------------------------------------------------------------|----|-----|--------------|------------------------|----------------------------------------------------------------------------------|
| <b>M<br/>MU<br/>-<br/>690<br/>52</b>        | Switching of origins to a post-replicative state                      | 13 | 90  | 0.<br>5<br>3 | 0.<br>0<br>7<br>0      | Mcm7,Psme3,Mcm4,Cdk2,Mcm6,Anapc2,Anapc4,Mcm3,Mcm2,Cdc27,Cdc23,Mcm5,Psmb9         |
| <b>M<br/>MU<br/>-<br/>680<br/>787<br/>8</b> | COPI-mediated anterograde transport                                   | 13 | 95  | 0.<br>5<br>1 | 0.<br>0<br>1<br>6      | Tubb6,Cog1,Arf4,Bet1l,Copb1,Arcn1,Copb2,Tmed2,Tmed3,Tubb2a,Arfgap3,Tubb2b,Copg1  |
| <b>M<br/>MU<br/>-<br/>535<br/>780<br/>1</b> | Programmed Cell Death                                                 | 13 | 116 | 0.<br>4<br>2 | 0.<br>0<br>3<br>3      | Ywhah,Apaf1,Ripk3,Casp8,Vim,Mkl1,Hist1h1a,Hmgb2,Bak1,Hist1h1b,Casp3,Dsp,Ripk1    |
| <b>M<br/>MU<br/>-<br/>983<br/>231</b>       | Factors involved in megakaryocyte development and platelet production | 13 | 118 | 0.<br>4<br>2 | 0.<br>0<br>8<br>3      | Tubb6,Hdac2,Dock8,Tubb2a,Tubb2b,Dock10,Klcl,Dock2,Hdac1,Akap10,Kdm1a,Cbx5,Jmjd1c |
| <b>M<br/>MU<br/>-<br/>721<br/>87</b>        | mRNA 3-end processing                                                 | 12 | 54  | 0.<br>7<br>2 | 0.<br>0<br>0<br>4<br>8 | Ddx39,Pabpn1,Cstf3,Ncbp1,Srsf9,Cstf2,Thoc2,Cpsf2,Papola,Srsf5,Srsf6,Srrm1        |
| <b>M<br/>MU<br/>-<br/>123<br/>697<br/>5</b> | Antigen processing-Cross presentation                                 | 12 | 92  | 0.<br>4<br>9 | 0.<br>0<br>2<br>2<br>7 | Calr,Cybb,Ncf1,Cyba,Psme3,Tapbp,Pdia3,Itgb5,Ncf4,Mrc2,Psmb9,Ncf2                 |

|                                             |                                                 |    |     |                              |                                   |                                                                                     |
|---------------------------------------------|-------------------------------------------------|----|-----|------------------------------|-----------------------------------|-------------------------------------------------------------------------------------|
| <b>M<br/>MU<br/>-<br/>681<br/>143<br/>4</b> | COPI-dependent Golgi-to-ER retrograde traffic   | 12 | 94  | 0.<br>0.<br>4<br>8           | 0.<br>0<br>2<br>6<br>1            | Tubb6,Arf4,Copb1,Arcn1,Copb2,Tmed2,Tmed3,Tubb2a,Arfgap3,Tubb2b,Klcl1,Copg1          |
| <b>M<br/>MU<br/>-<br/>255<br/>958<br/>3</b> | Cellular Senescence                             | 12 | 124 | 1.<br>8                      | 4.<br>7<br>9<br>e-<br>1<br>6      | Rbbp4,Asf1a,Hist1h2af,Hist1h1a,Hist1h1b,Ehmt2,Cdk2,Anapc2,Anapc4,Cdkn1c,Cdc27,Cdc23 |
| <b>M<br/>MU<br/>-<br/>054<br/>14</b>        | Dilated cardiomyopathy                          | 12 | 90  | 2.<br>2<br>9<br>e-<br>2<br>4 | 7.<br>2<br>2<br>9<br>e-<br>2<br>4 | Dmd,Sgcb,Sgcd,Sgcg,Dag1,Itga5,Itgb5,Cacng1,Adcy3,Tpm4,Tnnt2,Myh6                    |
| <b>M<br/>MU<br/>-<br/>054<br/>12</b>        | Arrhythmogenic right ventricular cardiomyopathy | 11 | 76  | 2.<br>3<br>3<br>e-<br>2<br>2 | 4.<br>1<br>6<br>e-<br>2<br>2      | Dsp,Ctnna3,Actn3,Dmd,Sgcb,Sgcd,Sgcg,Dag1,Itga5,Itgb5,Cacng1                         |
| <b>M<br/>MU<br/>-<br/>390<br/>522</b>       | Striated Muscle Contraction                     | 10 | 35  | 0.<br>0.<br>8<br>3<br>4<br>4 | 0.<br>0<br>0<br>0<br>4<br>4       | Tpm4,Actn3,Myl4,Myh8,Vim,Myh6,Myh3,Tnnt2,Dmd,Mybpc2                                 |
| <b>M<br/>MU<br/>-<br/>122</b>               | ROS and RNS production in phagocytes            | 9  | 36  | 0.<br>7<br>7                 | 0.<br>0<br>0<br>2<br>2            | Cybb,Ncf1,Cyba,Atp6v1e1,Atp6v1c1,Ncf4,Nos1,Atp6v1a,Ncf2                             |

|                                             |                                                     |   |    |              |                   |                                                   |
|---------------------------------------------|-----------------------------------------------------|---|----|--------------|-------------------|---------------------------------------------------|
| <b>255<br/>6</b>                            |                                                     |   |    |              |                   |                                                   |
| <b>M<br/>MU<br/>-<br/>689<br/>62</b>        | Activation of the pre-replicative complex           | 8 | 32 | 0.<br>7<br>7 | 0.<br>0<br>4<br>7 | Mcm7,Pola1,Mcm4,Cdk2,Mcm6,Mcm3,Mcm2,Mcm5          |
| <b>M<br/>MU<br/>-<br/>329<br/>968<br/>5</b> | Detoxification of Reactive Oxygen Species           | 8 | 34 | 0.<br>7<br>5 | 0.<br>0<br>6<br>6 | Cybb,Ncf1,Cyba,Gpx8,P4hb,Gpx7,Ncf4,Ncf2           |
| <b>M<br/>MU<br/>-<br/>566<br/>321<br/>3</b> | RHO GTPases Activate WASPs and WAVES                | 8 | 34 | 0.<br>7<br>5 | 0.<br>0<br>6<br>6 | Arpc2,Nckap1l,Wasf2,Arpc1b,Arpc3,Arpc4,Abi1,Actr3 |
| <b>M<br/>MU<br/>-<br/>176<br/>187</b>       | Activation of ATR in response to replication stress | 8 | 37 | 0.<br>7<br>1 | 0.<br>0<br>0<br>1 | Mcm7,Mcm4,Rfc4,Cdk2,Mcm6,Mcm3,Mcm2,Mcm5           |
| <b>M<br/>MU<br/>-<br/>750<br/>67</b>        | Processing of Capped Intronless Pre-mRNA            | 7 | 28 | 0.<br>7<br>7 | 0.<br>0<br>0<br>6 | Snrpf,Pabpn1,Cstf3,Ncbp1,Cstf2,Cpsf2,Papola       |
| <b>M<br/>MU<br/>-<br/>896<br/>404<br/>3</b> | Plasma lipoprotein clearance                        | 7 | 30 | 0.<br>7<br>4 | 0.<br>0<br>4<br>7 | Npc2,Apobrl,Lipa,Cltla,Hdlbp,Apoe,Soat1           |

|                                             |                                                                         |   |    |              |                        |                                             |
|---------------------------------------------|-------------------------------------------------------------------------|---|----|--------------|------------------------|---------------------------------------------|
| <b>M<br/>MU<br/>-<br/>217<br/>378<br/>2</b> | Binding and Uptake of Ligands<br>by Scavenger Receptors                 | 7 | 35 | 0.<br>6<br>7 | 0.<br>0<br>2<br>8<br>9 | Calr,Sparc,Hsp90b1,Msrl,Stab1,Hp,Apoe       |
| <b>M<br/>MU<br/>-<br/>679<br/>131<br/>2</b> | TP53 Regulates Transcription of<br>Cell Cycle Genes                     | 7 | 35 | 0.<br>6<br>7 | 0.<br>0<br>2<br>8<br>9 | Cdk2,Pcna,Cnot3,Npm1,Cnot2,Cnot8,Cdkn1c     |
| <b>M<br/>MU<br/>-<br/>300<br/>017<br/>1</b> | Non-integrin membrane-ECM<br>interactions                               | 7 | 37 | 0.<br>6<br>5 | 0.<br>0<br>3<br>6<br>9 | Col1a1,Vtn,Col5a1,Fn1,Itgb5,Col5a2,Col3a1   |
| <b>M<br/>MU<br/>-<br/>255<br/>958<br/>2</b> | Senescence-Associated<br>Secretory Phenotype (SASP)                     | 7 | 40 | 0.<br>6<br>2 | 0.<br>0<br>4<br>9<br>0 | Ehmt2,Cdk2,Anapc2,Anapc4,Cdc27,Cdc23,Cdkn1c |
| <b>M<br/>MU<br/>-<br/>123<br/>697<br/>3</b> | Cross-presentation of particulate<br>exogenous antigens<br>(phagosomes) | 6 | 8  | 1.<br>0<br>1 | 0.<br>0<br>0<br>4<br>4 | Cybb,Ncf1,Cyba,Itgb5,Ncf4,Ncf2              |
| <b>M<br/>MU<br/>-<br/>775<br/>95</b>        | Processing of Intronless Pre-<br>mRNAs                                  | 6 | 19 | 0.<br>8<br>7 | 0.<br>0<br>1<br>0<br>1 | Pabpn1,Cstf3,Ncbp1,Cstf2,Cpsf2,Papola       |

|                                             |                                                                |   |    |              |                              |                                       |
|---------------------------------------------|----------------------------------------------------------------|---|----|--------------|------------------------------|---------------------------------------|
| <b>M<br/>MU<br/>-<br/>895<br/>632<br/>1</b> | Nucleotide salvage                                             | 6 | 23 | 0.<br>7<br>9 | 0.<br>0<br>2<br>0<br>7       | Gmpr2,Ada,Upp1,Hprt,Uck2,Ampd2        |
| <b>M<br/>MU<br/>-<br/>566<br/>859<br/>9</b> | RHO GTPases Activate NADPH Oxidases                            | 6 | 24 | 0.<br>7<br>7 | 0.<br>0<br>2<br>4<br>3       | Cybb,Ncf1,Cyba,Ncf4,S100a9,Ncf2       |
| <b>M<br/>MU<br/>-<br/>176<br/>408</b>       | Regulation of APC/C activators between G1/S and early anaphase | 6 | 29 | 0.<br>6<br>9 | 0.<br>0<br>4<br>8<br>3       | Cdk2,Anapc2,Anapc4,Cdc27,Mad211,Cdc23 |
| <b>M<br/>MU<br/>-<br/>300<br/>048<br/>0</b> | Scavenging by Class A Receptors                                | 4 | 10 | 0.<br>9<br>8 | 0.<br>0<br>3<br>8<br>8       | Calr,Hsp90b1,Msr1,Apoe                |
| <b>M<br/>MU<br/>-<br/>042<br/>60</b>        | Cardiac muscle contraction                                     | 4 | 84 | 1.<br>8<br>5 | 1.<br>7<br>3<br>e-<br>0<br>5 | Myh6,Tnnt2,Tpm4,Cacng1                |
| <b>M<br/>MU<br/>-<br/>712<br/>88</b>        | Creatine metabolism                                            | 4 | 10 | 0.<br>9<br>8 | 0.<br>0<br>3<br>8<br>8       | Ckmt1,Ckb,Gatm,Gamt                   |

|                                                             |                              |   |   |              |                        |                   |
|-------------------------------------------------------------|------------------------------|---|---|--------------|------------------------|-------------------|
| <b>M</b><br><b>MU</b><br>-<br><b>156</b><br><b>697</b><br>7 | Fibronectin matrix formation | 3 | 4 | 1.<br>0<br>1 | 0.<br>0<br>4<br>0<br>2 | Itga5,Fn1,Ceacam1 |
|-------------------------------------------------------------|------------------------------|---|---|--------------|------------------------|-------------------|
